# Supplementary material for: Attention or instruction: Do sustained attentional abilities really differ between high and low hypnotisable persons?
Source: Psychol Res. 2017 Mar 7;82(4):700–7. doi: 10.1007/s00426-017-0850-1 (PMC6013507; doi:10.1007/s00426-017-0850-1)
Supplement: Supplementary file 1 — Supplementary material 1 (CSV 198 KB) [file 426_2017_850_MOESM1_ESM.csv]

Subjects	Block	Session	Instruction	Resp	Group	Instruction
MC1	1	1	3	2	M	C
MC1	1	1	3	2	M	C
MC1	1	1	3	1	M	C
MC1	1	1	3	2	M	C
MC1	1	1	3	1	M	C
MC1	1	1	3	2	M	C
MC1	1	1	3	1	M	C
MC1	1	1	3	2	M	C
MC1	1	1	3	1	M	C
MC1	1	1	3	2	M	C
MC1	1	1	3	1	M	C
MC1	1	1	3	2	M	C
MC1	1	1	3	1	M	C
MC1	1	2	3	2	M	C
MC1	1	2	3	1	M	C
MC1	1	2	3	2	M	C
MC1	1	2	3	1	M	C
MC1	1	2	3	2	M	C
MC1	1	2	3	1	M	C
MC1	1	2	3	2	M	C
MC1	1	2	3	1	M	C
MC1	1	2	3	2	M	C
MC1	1	2	3	1	M	C
MC1	1	2	3	2	M	C
MC1	1	2	3	1	M	C
MC1	1	2	3	2	M	C
MC1	1	2	3	1	M	C
MC1	1	2	3	2	M	C
MC1	1	2	3	1	M	C
MC1	1	2	3	2	M	C
MC1	1	2	3	1	M	C
MC1	1	2	3	2	M	C
MC1	1	2	3	1	M	C
MC1	1	3	3	2	M	C
MC1	1	3	3	1	M	C
MC1	1	3	3	2	M	C
MC1	1	3	3	1	M	C
MC1	1	3	3	2	M	C
MC1	1	3	3	1	M	C
MC1	1	3	3	2	M	C
MC1	1	3	3	1	M	C
MC1	1	3	3	2	M	C
MC1	1	3	3	1	M	C
MC1	1	3	3	2	M	C
MC1	1	3	3	1	M	C
MC1	1	3	3	2	M	C
MC1	1	3	3	1	M	C
MC1	1	3	3	2	M	C
MC1	1	3	3	1	M	C
MC1	1	3	3	2	M	C
MC1	1	4	3	2	M	C
MC1	1	4	3	1	M	C
MC1	1	4	3	2	M	C
MC1	1	4	3	1	M	C
MC1	1	4	3	2	M	C
MC1	1	4	3	1	M	C
MC1	1	4	3	2	M	C
MC1	1	4	3	1	M	C
MC1	1	4	3	2	M	C
MC1	1	4	3	1	M	C
MC1	1	4	3	2	M	C
MC1	1	4	3	1	M	C
MC1	1	4	3	2	M	C
MC1	1	4	3	1	M	C
MC1	1	4	3	2	M	C
MC1	1	4	3	1	M	C
MC1	1	4	3	2	M	C
MC1	1	4	3	1	M	C
MC1	1	5	3	2	M	C
MC1	1	5	3	1	M	C
MC1	1	5	3	2	M	C
MC1	1	5	3	1	M	C
MC1	1	5	3	2	M	C
MC1	1	5	3	1	M	C
MC1	1	5	3	2	M	C
MC1	1	5	3	1	M	C
MC1	1	5	3	2	M	C
MC1	1	5	3	1	M	C
MC1	1	5	3	2	M	C
MC1	1	5	3	1	M	C
MC1	1	5	3	2	M	C
MC1	1	5	3	1	M	C
MC1	1	5	3	2	M	C
MC1	2	1	3	2	M	C
MC1	2	1	3	1	M	C
MC1	2	1	3	2	M	C
MC1	2	1	3	1	M	C
MC1	2	1	3	2	M	C
MC1	2	1	3	1	M	C
MC1	2	1	3	2	M	C
MC1	2	1	3	1	M	C
MC1	2	1	3	2	M	C
MC1	2	1	3	1	M	C
MC1	2	1	3	2	M	C
MC1	2	1	3	1	M	C
MC1	2	1	3	2	M	C
MC1	2	1	3	1	M	C
MC1	2	1	3	2	M	C
MC1	2	1	3	1	M	C
MC1	2	1	3	2	M	C
MC1	2	1	3	1	M	C
MC1	2	1	3	2	M	C
MC1	2	2	3	2	M	C
MC1	2	2	3	1	M	C
MC1	2	2	3	2	M	C
MC1	2	2	3	1	M	C
MC1	2	2	3	2	M	C
MC1	2	2	3	1	M	C
MC1	2	2	3	2	M	C
MC1	2	2	3	1	M	C
MC1	2	2	3	2	M	C
MC1	2	2	3	1	M	C
MC1	2	2	3	2	M	C
MC1	2	2	3	1	M	C
MC1	2	2	3	2	M	C
MC1	2	2	3	1	M	C
MC1	2	2	3	2	M	C
MC1	2	2	3	1	M	C
MC1	2	2	3	2	M	C
MC1	2	2	3	1	M	C
MC1	2	3	3	2	M	C
MC1	2	3	3	1	M	C
MC1	2	3	3	2	M	C
MC1	2	3	3	1	M	C
MC1	2	3	3	2	M	C
MC1	2	3	3	1	M	C
MC1	2	3	3	2	M	C
MC1	2	3	3	1	M	C
MC1	2	3	3	2	M	C
MC1	2	3	3	1	M	C
MC1	2	3	3	2	M	C
MC1	2	3	3	1	M	C
MC1	2	3	3	2	M	C
MC1	2	4	3	2	M	C
MC1	2	4	3	1	M	C
MC1	2	4	3	2	M	C
MC1	2	4	3	1	M	C
MC1	2	4	3	2	M	C
MC1	2	4	3	1	M	C
MC1	2	4	3	2	M	C
MC1	2	4	3	1	M	C
MC1	2	4	3	2	M	C
MC1	2	4	3	1	M	C
MC1	2	4	3	2	M	C
MC1	2	4	3	1	M	C
MC1	2	4	3	2	M	C
MC1	2	4	3	1	M	C
MC1	2	4	3	2	M	C
MC1	2	4	3	1	M	C
MC1	2	5	3	2	M	C
MC1	2	5	3	1	M	C
MC1	2	5	3	2	M	C
MC1	2	5	3	1	M	C
MC1	2	5	3	2	M	C
MC1	2	5	3	1	M	C
MC1	2	5	3	2	M	C
MC1	2	5	3	1	M	C
MC1	2	5	3	2	M	C
MC1	2	5	3	1	M	C
MC1	2	5	3	2	M	C
MC1	2	5	3	1	M	C
MC1	2	5	3	2	M	C
MC1	2	5	3	1	M	C
MC1	2	5	3	2	M	C
MC1	2	5	3	1	M	C
MC1	2	5	3	2	M	C
MC1	2	5	3	1	M	C
HC1	1	1	1	2	H	C
HC1	1	1	1	1	H	C
HC1	1	1	1	2	H	C
HC1	1	1	1	1	H	C
HC1	1	1	1	2	H	C
HC1	1	1	1	1	H	C
HC1	1	1	1	2	H	C
HC1	1	1	1	1	H	C
HC1	1	1	1	2	H	C
HC1	1	1	1	1	H	C
HC1	1	1	1	2	H	C
HC1	1	1	1	1	H	C
HC1	1	1	1	2	H	C
HC1	1	1	1	1	H	C
HC1	1	1	1	2	H	C
HC1	1	1	1	1	H	C
HC1	1	1	1	2	H	C
HC1	1	1	1	1	H	C
HC1	1	1	1	2	H	C
HC1	1	1	1	1	H	C
HC1	1	1	1	2	H	C
HC1	1	1	1	1	H	C
HC1	1	1	1	2	H	C
HC1	1	1	1	1	H	C
HC1	1	1	1	2	H	C
HC1	1	1	1	1	H	C
HC1	1	1	1	2	H	C
HC1	1	1	1	1	H	C
HC1	1	1	1	2	H	C
HC1	1	2	1	2	H	C
HC1	1	2	1	1	H	C
HC1	1	2	1	2	H	C
HC1	1	2	1	2	H	C
HC1	1	2	1	1	H	C
HC1	1	2	1	2	H	C
HC1	1	2	1	1	H	C
HC1	1	2	1	2	H	C
HC1	1	2	1	1	H	C
HC1	1	2	1	2	H	C
HC1	1	2	1	1	H	C
HC1	1	2	1	2	H	C
HC1	1	2	1	1	H	C
HC1	1	2	1	2	H	C
HC1	1	2	1	1	H	C
HC1	1	2	1	2	H	C
HC1	1	2	1	1	H	C
HC1	1	2	1	2	H	C
HC1	1	2	1	1	H	C
HC1	1	2	1	2	H	C
HC1	1	2	1	1	H	C
HC1	1	2	1	2	H	C
HC1	1	2	1	1	H	C
HC1	1	2	1	2	H	C
HC1	1	2	1	1	H	C
HC1	1	2	1	2	H	C
HC1	1	2	1	1	H	C
HC1	1	2	1	2	H	C
HC1	1	2	1	1	H	C
HC1	1	3	1	2	H	C
HC1	1	3	1	1	H	C
HC1	1	3	1	2	H	C
HC1	1	3	1	1	H	C
HC1	1	3	1	2	H	C
HC1	1	3	1	1	H	C
HC1	1	3	1	2	H	C
HC1	1	3	1	1	H	C
HC1	1	3	1	2	H	C
HC1	1	3	1	1	H	C
HC1	1	3	1	2	H	C
HC1	1	3	1	1	H	C
HC1	1	3	1	2	H	C
HC1	1	3	1	1	H	C
HC1	1	3	1	2	H	C
HC1	1	3	1	1	H	C
HC1	1	3	1	2	H	C
HC1	1	3	1	1	H	C
HC1	1	3	1	2	H	C
HC1	1	3	1	1	H	C
HC1	1	4	1	2	H	C
HC1	1	4	1	1	H	C
HC1	1	4	1	2	H	C
HC1	1	4	1	1	H	C
HC1	1	4	1	2	H	C
HC1	1	4	1	1	H	C
HC1	1	4	1	2	H	C
HC1	1	4	1	1	H	C
HC1	1	4	1	2	H	C
HC1	1	4	1	1	H	C
HC1	1	4	1	2	H	C
HC1	1	4	1	1	H	C
HC1	1	4	1	2	H	C
HC1	1	4	1	1	H	C
HC1	1	4	1	2	H	C
HC1	1	4	1	1	H	C
HC1	1	4	1	2	H	C
HC1	1	4	1	1	H	C
HC1	1	4	1	2	H	C
HC1	1	4	1	1	H	C
HC1	1	4	1	2	H	C
HC1	1	4	1	1	H	C
HC1	1	5	1	2	H	C
HC1	1	5	1	1	H	C
HC1	1	5	1	2	H	C
HC1	1	5	1	1	H	C
HC1	1	5	1	2	H	C
HC1	1	5	1	1	H	C
HC1	1	5	1	2	H	C
HC1	1	5	1	1	H	C
HC1	1	5	1	2	H	C
HC1	1	5	1	1	H	C
HC1	1	5	1	2	H	C
HC1	1	5	1	1	H	C
HC1	1	5	1	2	H	C
HC1	1	5	1	1	H	C
HC1	1	5	1	2	H	C
HC1	1	5	1	1	H	C
HC1	2	1	1	2	H	C
HC1	2	1	1	1	H	C
HC1	2	1	1	2	H	C
HC1	2	1	1	1	H	C
HC1	2	1	1	2	H	C
HC1	2	1	1	1	H	C
HC1	2	1	1	2	H	C
HC1	2	1	1	1	H	C
HC1	2	1	1	2	H	C
HC1	2	1	1	1	H	C
HC1	2	1	1	2	H	C
HC1	2	1	1	1	H	C
HC1	2	1	1	2	H	C
HC1	2	1	1	1	H	C
HC1	2	1	1	2	H	C
HC1	2	1	1	1	H	C
HC1	2	1	1	2	H	C
HC1	2	1	1	1	H	C
HC1	2	1	1	2	H	C
HC1	2	1	1	1	H	C
HC1	2	1	1	2	H	C
HC1	2	1	1	1	H	C
HC1	2	2	1	2	H	C
HC1	2	2	1	1	H	C
HC1	2	2	1	2	H	C
HC1	2	2	1	1	H	C
HC1	2	2	1	2	H	C
HC1	2	2	1	1	H	C
HC1	2	2	1	2	H	C
HC1	2	2	1	1	H	C
HC1	2	2	1	2	H	C
HC1	2	2	1	1	H	C
HC1	2	2	1	2	H	C
HC1	2	2	1	1	H	C
HC1	2	2	1	2	H	C
HC1	2	2	1	1	H	C
HC1	2	2	1	2	H	C
HC1	2	2	1	1	H	C
HC1	2	2	1	2	H	C
HC1	2	2	1	1	H	C
HC1	2	2	1	2	H	C
HC1	2	2	1	1	H	C
HC1	2	2	1	2	H	C
HC1	2	2	1	1	H	C
HC1	2	3	1	1	H	C
HC1	2	3	1	2	H	C
HC1	2	3	1	1	H	C
HC1	2	3	1	2	H	C
HC1	2	3	1	1	H	C
HC1	2	3	1	2	H	C
HC1	2	3	1	1	H	C
HC1	2	3	1	2	H	C
HC1	2	3	1	1	H	C
HC1	2	3	1	2	H	C
HC1	2	3	1	1	H	C
HC1	2	3	1	2	H	C
HC1	2	3	1	1	H	C
HC1	2	3	1	2	H	C
HC1	2	3	1	1	H	C
HC1	2	3	1	2	H	C
HC1	2	3	1	1	H	C
HC1	2	3	1	2	H	C
HC1	2	3	1	1	H	C
HC1	2	3	1	2	H	C
HC1	2	3	1	1	H	C
HC1	2	3	1	2	H	C
HC1	2	4	1	2	H	C
HC1	2	4	1	1	H	C
HC1	2	4	1	2	H	C
HC1	2	4	1	1	H	C
HC1	2	4	1	2	H	C
HC1	2	4	1	1	H	C
HC1	2	4	1	2	H	C
HC1	2	4	1	1	H	C
HC1	2	4	1	2	H	C
HC1	2	4	1	1	H	C
HC1	2	4	1	2	H	C
HC1	2	4	1	1	H	C
HC1	2	4	1	2	H	C
HC1	2	4	1	1	H	C
HC1	2	4	1	2	H	C
HC1	2	4	1	1	H	C
HC1	2	4	1	2	H	C
HC1	2	4	1	1	H	C
HC1	2	4	1	2	H	C
HC1	2	4	1	1	H	C
HC1	2	4	1	2	H	C
HC1	2	5	1	2	H	C
HC1	2	5	1	1	H	C
HC1	2	5	1	2	H	C
HC1	2	5	1	1	H	C
HC1	2	5	1	2	H	C
HC1	2	5	1	1	H	C
HC1	2	5	1	2	H	C
HC1	2	5	1	1	H	C
HC1	2	5	1	2	H	C
HC1	2	5	1	1	H	C
HC1	2	5	1	2	H	C
HC1	2	5	1	1	H	C
HC1	2	5	1	2	H	C
HC1	2	5	1	1	H	C
HC1	2	5	1	2	H	C
HC1	2	5	1	1	H	C
HC1	2	5	1	2	H	C
HC1	2	5	1	1	H	C
HC1	2	5	1	2	H	C
HC1	2	5	1	1	H	C
HC1	2	5	1	2	H	C
HC1	2	5	1	1	H	C
HC1	2	5	1	2	H	C
HC1	2	5	1	1	H	C
HC1	2	5	1	2	H	C
HC1	2	5	1	1	H	C
HC1	2	5	1	2	H	C
HC11	1	1	1	1	H	C
HC11	1	1	1	2	H	C
HC11	1	1	1	1	H	C
HC11	1	1	1	2	H	C
HC11	1	1	1	1	H	C
HC11	1	1	1	2	H	C
HC11	1	1	1	1	H	C
HC11	1	1	1	2	H	C
HC11	1	1	1	1	H	C
HC11	1	1	1	2	H	C
HC11	1	2	1	1	H	C
HC11	1	2	1	2	H	C
HC11	1	2	1	1	H	C
HC11	1	2	1	2	H	C
HC11	1	2	1	1	H	C
HC11	1	2	1	2	H	C
HC11	1	2	1	1	H	C
HC11	1	2	1	2	H	C
HC11	1	2	1	1	H	C
HC11	1	2	1	2	H	C
HC11	1	2	1	1	H	C
HC11	1	2	1	2	H	C
HC11	1	2	1	1	H	C
HC11	1	2	1	2	H	C
HC11	1	2	1	1	H	C
HC11	1	2	1	2	H	C
HC11	1	2	1	1	H	C
HC11	1	2	1	2	H	C
HC11	1	2	1	1	H	C
HC11	1	2	1	2	H	C
HC11	1	3	1	1	H	C
HC11	1	3	1	2	H	C
HC11	1	3	1	1	H	C
HC11	1	3	1	2	H	C
HC11	1	3	1	1	H	C
HC11	1	3	1	2	H	C
HC11	1	3	1	1	H	C
HC11	1	3	1	2	H	C
HC11	1	3	1	1	H	C
HC11	1	3	1	2	H	C
HC11	1	3	1	1	H	C
HC11	1	3	1	2	H	C
HC11	1	3	1	1	H	C
HC11	1	3	1	2	H	C
HC11	1	4	1	1	H	C
HC11	1	4	1	2	H	C
HC11	1	4	1	1	H	C
HC11	1	4	1	2	H	C
HC11	1	4	1	1	H	C
HC11	1	4	1	2	H	C
HC11	1	4	1	1	H	C
HC11	1	4	1	2	H	C
HC11	1	4	1	1	H	C
HC11	1	4	1	1	H	C
HC11	1	4	1	2	H	C
HC11	1	4	1	1	H	C
HC11	1	4	1	2	H	C
HC11	1	4	1	1	H	C
HC11	1	4	1	2	H	C
HC11	1	5	1	1	H	C
HC11	1	5	1	2	H	C
HC11	1	5	1	1	H	C
HC11	1	5	1	2	H	C
HC11	1	5	1	1	H	C
HC11	1	5	1	2	H	C
HC11	1	5	1	1	H	C
HC11	1	5	1	2	H	C
HC11	1	5	1	1	H	C
HC11	1	5	1	2	H	C
HC11	1	5	1	1	H	C
HC11	1	5	1	2	H	C
HC11	1	5	1	1	H	C
HC11	1	5	1	2	H	C
HC11	1	5	1	1	H	C
HC11	1	5	1	2	H	C
HC11	1	5	1	1	H	C
HC11	1	5	1	2	H	C
HC11	1	5	1	1	H	C
HC11	1	5	1	2	H	C
HC11	1	5	1	1	H	C
HC11	2	1	1	1	H	C
HC11	2	1	1	2	H	C
HC11	2	1	1	1	H	C
HC11	2	1	1	2	H	C
HC11	2	1	1	1	H	C
HC11	2	1	1	2	H	C
HC11	2	1	1	1	H	C
HC11	2	1	1	2	H	C
HC11	2	1	1	1	H	C
HC11	2	1	1	2	H	C
HC11	2	1	1	1	H	C
HC11	2	1	1	2	H	C
HC11	2	1	1	1	H	C
HC11	2	1	1	2	H	C
HC11	2	1	1	1	H	C
HC11	2	1	1	2	H	C
HC11	2	1	1	1	H	C
HC11	2	1	1	2	H	C
HC11	2	1	1	1	H	C
HC11	2	1	1	2	H	C
HC11	2	1	1	1	H	C
HC11	2	1	1	2	H	C
HC11	2	1	1	1	H	C
HC11	2	2	1	1	H	C
HC11	2	2	1	2	H	C
HC11	2	2	1	1	H	C
HC11	2	2	1	2	H	C
HC11	2	2	1	1	H	C
HC11	2	2	1	2	H	C
HC11	2	2	1	1	H	C
HC11	2	2	1	2	H	C
HC11	2	2	1	1	H	C
HC11	2	2	1	2	H	C
HC11	2	2	1	1	H	C
HC11	2	2	1	2	H	C
HC11	2	2	1	1	H	C
HC11	2	2	1	2	H	C
HC11	2	2	1	1	H	C
HC11	2	2	1	2	H	C
HC11	2	2	1	1	H	C
HC11	2	2	1	2	H	C
HC11	2	2	1	1	H	C
HC11	2	2	1	2	H	C
HC11	2	2	1	1	H	C
HC11	2	3	1	1	H	C
HC11	2	3	1	2	H	C
HC11	2	3	1	1	H	C
HC11	2	3	1	2	H	C
HC11	2	3	1	1	H	C
HC11	2	3	1	2	H	C
HC11	2	3	1	1	H	C
HC11	2	3	1	2	H	C
HC11	2	3	1	1	H	C
HC11	2	3	1	2	H	C
HC11	2	3	1	1	H	C
HC11	2	3	1	2	H	C
HC11	2	3	1	1	H	C
HC11	2	3	1	2	H	C
HC11	2	3	1	1	H	C
HC11	2	3	1	2	H	C
HC11	2	3	1	1	H	C
HC11	2	3	1	2	H	C
HC11	2	3	1	1	H	C
HC11	2	4	1	1	H	C
HC11	2	4	1	2	H	C
HC11	2	4	1	1	H	C
HC11	2	4	1	2	H	C
HC11	2	4	1	1	H	C
HC11	2	4	1	2	H	C
HC11	2	4	1	1	H	C
HC11	2	4	1	2	H	C
HC11	2	4	1	1	H	C
HC11	2	4	1	2	H	C
HC11	2	4	1	1	H	C
HC11	2	4	1	2	H	C
HC11	2	4	1	1	H	C
HC11	2	4	1	2	H	C
HC11	2	4	1	1	H	C
HC11	2	4	1	1	H	C
HC11	2	5	1	1	H	C
HC11	2	5	1	2	H	C
HC11	2	5	1	1	H	C
HC11	2	5	1	2	H	C
HC11	2	5	1	1	H	C
HC11	2	5	1	2	H	C
HC11	2	5	1	1	H	C
HC11	2	5	1	2	H	C
HC11	2	5	1	1	H	C
HC11	2	5	1	2	H	C
HC11	2	5	1	1	H	C
HC11	2	5	1	2	H	C
HC11	2	5	1	1	H	C
HC11	2	5	1	2	H	C
HC11	2	5	1	1	H	C
HC11	2	5	1	2	H	C
HC11	2	5	1	1	H	C
HC11	2	5	1	2	H	C
HC11	2	5	1	1	H	C
HC11	2	5	1	2	H	C
HC11	2	5	1	1	H	C
HC11	2	5	1	2	H	C
HC11	2	5	1	1	H	C
HC11	2	5	1	2	H	C
HC11	2	5	1	1	H	C
HC11	2	5	1	2	H	C
HC11	2	5	1	1	H	C
HC13	1	1	1	2	H	C
HC13	1	1	1	1	H	C
HC13	1	1	1	2	H	C
HC13	1	1	1	1	H	C
HC13	1	1	1	2	H	C
HC13	1	1	1	1	H	C
HC13	1	1	1	2	H	C
HC13	1	1	1	1	H	C
HC13	1	1	1	2	H	C
HC13	1	1	1	1	H	C
HC13	1	1	1	2	H	C
HC13	1	1	1	1	H	C
HC13	1	1	1	2	H	C
HC13	1	1	1	1	H	C
HC13	1	1	1	2	H	C
HC13	1	2	1	2	H	C
HC13	1	2	1	1	H	C
HC13	1	2	1	2	H	C
HC13	1	2	1	1	H	C
HC13	1	2	1	2	H	C
HC13	1	2	1	1	H	C
HC13	1	2	1	2	H	C
HC13	1	2	1	1	H	C
HC13	1	2	1	2	H	C
HC13	1	2	1	1	H	C
HC13	1	2	1	2	H	C
HC13	1	2	1	1	H	C
HC13	1	2	1	2	H	C
HC13	1	2	1	1	H	C
HC13	1	2	1	2	H	C
HC13	1	2	1	1	H	C
HC13	1	2	1	2	H	C
HC13	1	2	1	1	H	C
HC13	1	3	1	2	H	C
HC13	1	3	1	1	H	C
HC13	1	3	1	2	H	C
HC13	1	3	1	1	H	C
HC13	1	3	1	2	H	C
HC13	1	3	1	1	H	C
HC13	1	3	1	2	H	C
HC13	1	3	1	1	H	C
HC13	1	3	1	2	H	C
HC13	1	3	1	1	H	C
HC13	1	3	1	2	H	C
HC13	1	3	1	1	H	C
HC13	1	3	1	2	H	C
HC13	1	3	1	1	H	C
HC13	1	3	1	2	H	C
HC13	1	3	1	1	H	C
HC13	1	3	1	2	H	C
HC13	1	3	1	1	H	C
HC13	1	4	1	2	H	C
HC13	1	4	1	1	H	C
HC13	1	4	1	2	H	C
HC13	1	4	1	1	H	C
HC13	1	4	1	2	H	C
HC13	1	4	1	1	H	C
HC13	1	4	1	2	H	C
HC13	1	4	1	1	H	C
HC13	1	4	1	2	H	C
HC13	1	4	1	1	H	C
HC13	1	4	1	2	H	C
HC13	1	5	1	2	H	C
HC13	1	5	1	1	H	C
HC13	1	5	1	2	H	C
HC13	1	5	1	1	H	C
HC13	1	5	1	2	H	C
HC13	1	5	1	1	H	C
HC13	1	5	1	1	H	C
HC13	1	5	1	2	H	C
HC13	1	5	1	1	H	C
HC13	1	5	1	2	H	C
HC13	1	5	1	1	H	C
HC13	1	5	1	2	H	C
HC13	1	5	1	1	H	C
HC13	1	5	1	2	H	C
HC13	1	5	1	1	H	C
HC13	2	1	1	2	H	C
HC13	2	1	1	1	H	C
HC13	2	1	1	1	H	C
HC13	2	1	1	2	H	C
HC13	2	1	1	1	H	C
HC13	2	1	1	2	H	C
HC13	2	1	1	1	H	C
HC13	2	1	1	2	H	C
HC13	2	1	1	1	H	C
HC13	2	1	1	2	H	C
HC13	2	1	1	1	H	C
HC13	2	1	1	2	H	C
HC13	2	1	1	1	H	C
HC13	2	1	1	2	H	C
HC13	2	1	1	1	H	C
HC13	2	1	1	2	H	C
HC13	2	1	1	1	H	C
HC13	2	1	1	2	H	C
HC13	2	1	1	1	H	C
HC13	2	1	1	2	H	C
HC13	2	1	1	1	H	C
HC13	2	1	1	2	H	C
HC13	2	1	1	1	H	C
HC13	2	2	1	2	H	C
HC13	2	2	1	1	H	C
HC13	2	2	1	2	H	C
HC13	2	2	1	1	H	C
HC13	2	2	1	2	H	C
HC13	2	2	1	1	H	C
HC13	2	2	1	2	H	C
HC13	2	2	1	1	H	C
HC13	2	2	1	2	H	C
HC13	2	2	1	1	H	C
HC13	2	2	1	2	H	C
HC13	2	2	1	1	H	C
HC13	2	2	1	2	H	C
HC13	2	2	1	1	H	C
HC13	2	2	1	2	H	C
HC13	2	2	1	1	H	C
HC13	2	2	1	2	H	C
HC13	2	3	1	2	H	C
HC13	2	3	1	1	H	C
HC13	2	3	1	2	H	C
HC13	2	3	1	1	H	C
HC13	2	3	1	2	H	C
HC13	2	3	1	1	H	C
HC13	2	3	1	2	H	C
HC13	2	3	1	1	H	C
HC13	2	3	1	2	H	C
HC13	2	3	1	1	H	C
HC13	2	3	1	2	H	C
HC13	2	3	1	1	H	C
HC13	2	3	1	2	H	C
HC13	2	3	1	1	H	C
HC13	2	4	1	1	H	C
HC13	2	4	1	2	H	C
HC13	2	4	1	1	H	C
HC13	2	4	1	2	H	C
HC13	2	4	1	1	H	C
HC13	2	4	1	2	H	C
HC13	2	4	1	1	H	C
HC13	2	4	1	2	H	C
HC13	2	4	1	1	H	C
HC13	2	4	1	2	H	C
HC13	2	4	1	1	H	C
HC13	2	4	1	2	H	C
HC13	2	4	1	1	H	C
HC13	2	4	1	2	H	C
HC13	2	4	1	1	H	C
HC13	2	4	1	2	H	C
HC13	2	4	1	1	H	C
HC13	2	5	1	2	H	C
HC13	2	5	1	1	H	C
HC13	2	5	1	2	H	C
HC13	2	5	1	1	H	C
HC13	2	5	1	2	H	C
HC13	2	5	1	1	H	C
HC13	2	5	1	2	H	C
HC13	2	5	1	1	H	C
HC13	2	5	1	2	H	C
HC13	2	5	1	1	H	C
HC13	2	5	1	2	H	C
HC13	2	5	1	1	H	C
HC13	2	5	1	2	H	C
HC13	2	5	1	1	H	C
HC13	2	5	1	2	H	C
HC13	2	5	1	1	H	C
HC15	1	1	1	1	H	C
HC15	1	1	1	2	H	C
HC15	1	1	1	1	H	C
HC15	1	1	1	2	H	C
HC15	1	1	1	1	H	C
HC15	1	1	1	2	H	C
HC15	1	1	1	1	H	C
HC15	1	1	1	2	H	C
HC15	1	1	1	1	H	C
HC15	1	1	1	2	H	C
HC15	1	1	1	1	H	C
HC15	1	1	1	2	H	C
HC15	1	1	1	1	H	C
HC15	1	1	1	2	H	C
HC15	1	1	1	1	H	C
HC15	1	1	1	2	H	C
HC15	1	1	1	1	H	C
HC15	1	1	1	2	H	C
HC15	1	1	1	1	H	C
HC15	1	1	1	2	H	C
HC15	1	1	1	2	H	C
HC15	1	1	1	1	H	C
HC15	1	1	1	2	H	C
HC15	1	2	1	2	H	C
HC15	1	2	1	1	H	C
HC15	1	2	1	2	H	C
HC15	1	2	1	1	H	C
HC15	1	2	1	2	H	C
HC15	1	2	1	1	H	C
HC15	1	2	1	1	H	C
HC15	1	2	1	2	H	C
HC15	1	2	1	1	H	C
HC15	1	2	1	2	H	C
HC15	1	2	1	1	H	C
HC15	1	2	1	2	H	C
HC15	1	2	1	1	H	C
HC15	1	2	1	2	H	C
HC15	1	2	1	1	H	C
HC15	1	2	1	2	H	C
HC15	1	2	1	1	H	C
HC15	1	2	1	2	H	C
HC15	1	2	1	1	H	C
HC15	1	2	1	2	H	C
HC15	1	2	1	1	H	C
HC15	1	2	1	2	H	C
HC15	1	2	1	1	H	C
HC15	1	3	1	1	H	C
HC15	1	3	1	2	H	C
HC15	1	3	1	1	H	C
HC15	1	3	1	2	H	C
HC15	1	3	1	1	H	C
HC15	1	3	1	2	H	C
HC15	1	3	1	1	H	C
HC15	1	3	1	2	H	C
HC15	1	3	1	1	H	C
HC15	1	3	1	2	H	C
HC15	1	3	1	1	H	C
HC15	1	3	1	2	H	C
HC15	1	3	1	1	H	C
HC15	1	3	1	2	H	C
HC15	1	3	1	1	H	C
HC15	1	4	1	1	H	C
HC15	1	4	1	2	H	C
HC15	1	4	1	1	H	C
HC15	1	4	1	2	H	C
HC15	1	4	1	1	H	C
HC15	1	4	1	2	H	C
HC15	1	4	1	1	H	C
HC15	1	4	1	1	H	C
HC15	1	4	1	2	H	C
HC15	1	4	1	1	H	C
HC15	1	4	1	2	H	C
HC15	1	4	1	1	H	C
HC15	1	4	1	2	H	C
HC15	1	4	1	1	H	C
HC15	1	4	1	2	H	C
HC15	1	4	1	1	H	C
HC15	1	4	1	2	H	C
HC15	1	4	1	1	H	C
HC15	1	5	1	1	H	C
HC15	1	5	1	2	H	C
HC15	1	5	1	1	H	C
HC15	1	5	1	2	H	C
HC15	1	5	1	1	H	C
HC15	1	5	1	2	H	C
HC15	1	5	1	1	H	C
HC15	1	5	1	2	H	C
HC15	1	5	1	1	H	C
HC15	1	5	1	2	H	C
HC15	1	5	1	2	H	C
HC15	1	5	1	1	H	C
HC15	1	5	1	1	H	C
HC15	1	5	1	2	H	C
HC15	1	5	1	1	H	C
HC15	1	5	1	2	H	C
HC15	1	5	1	1	H	C
HC15	1	5	1	2	H	C
HC15	2	1	1	1	H	C
HC15	2	1	1	2	H	C
HC15	2	1	1	1	H	C
HC15	2	1	1	2	H	C
HC15	2	1	1	1	H	C
HC15	2	1	1	2	H	C
HC15	2	1	1	1	H	C
HC15	2	1	1	2	H	C
HC15	2	1	1	1	H	C
HC15	2	1	1	2	H	C
HC15	2	1	1	1	H	C
HC15	2	1	1	2	H	C
HC15	2	1	1	1	H	C
HC15	2	1	1	2	H	C
HC15	2	1	1	1	H	C
HC15	2	1	1	2	H	C
HC15	2	1	1	1	H	C
HC15	2	2	1	1	H	C
HC15	2	2	1	2	H	C
HC15	2	2	1	1	H	C
HC15	2	2	1	2	H	C
HC15	2	2	1	1	H	C
HC15	2	2	1	2	H	C
HC15	2	2	1	1	H	C
HC15	2	2	1	2	H	C
HC15	2	2	1	1	H	C
HC15	2	2	1	2	H	C
HC15	2	2	1	1	H	C
HC15	2	2	1	1	H	C
HC15	2	2	1	2	H	C
HC15	2	2	1	1	H	C
HC15	2	2	1	1	H	C
HC15	2	2	1	2	H	C
HC15	2	2	1	1	H	C
HC15	2	2	1	2	H	C
HC15	2	2	1	1	H	C
HC15	2	2	1	1	H	C
HC15	2	2	1	2	H	C
HC15	2	2	1	1	H	C
HC15	2	2	1	1	H	C
HC15	2	3	1	1	H	C
HC15	2	3	1	2	H	C
HC15	2	3	1	1	H	C
HC15	2	3	1	2	H	C
HC15	2	3	1	1	H	C
HC15	2	3	1	2	H	C
HC15	2	3	1	1	H	C
HC15	2	3	1	2	H	C
HC15	2	3	1	1	H	C
HC15	2	3	1	2	H	C
HC15	2	3	1	1	H	C
HC15	2	3	1	1	H	C
HC15	2	3	1	1	H	C
HC15	2	3	1	2	H	C
HC15	2	3	1	1	H	C
HC15	2	3	1	2	H	C
HC15	2	3	1	1	H	C
HC15	2	3	1	2	H	C
HC15	2	3	1	1	H	C
HC15	2	3	1	2	H	C
HC15	2	4	1	1	H	C
HC15	2	4	1	2	H	C
HC15	2	4	1	1	H	C
HC15	2	4	1	2	H	C
HC15	2	4	1	1	H	C
HC15	2	4	1	2	H	C
HC15	2	4	1	1	H	C
HC15	2	4	1	2	H	C
HC15	2	4	1	1	H	C
HC15	2	4	1	2	H	C
HC15	2	4	1	1	H	C
HC15	2	4	1	2	H	C
HC15	2	4	1	1	H	C
HC15	2	4	1	2	H	C
HC15	2	4	1	1	H	C
HC15	2	4	1	2	H	C
HC15	2	5	1	1	H	C
HC15	2	5	1	2	H	C
HC15	2	5	1	1	H	C
HC15	2	5	1	2	H	C
HC15	2	5	1	1	H	C
HC15	2	5	1	2	H	C
HC15	2	5	1	1	H	C
HC15	2	5	1	2	H	C
HC15	2	5	1	1	H	C
HC15	2	5	1	1	H	C
HC15	2	5	1	2	H	C
HC15	2	5	1	2	H	C
HC15	2	5	1	1	H	C
HC15	2	5	1	2	H	C
HC15	2	5	1	1	H	C
HC15	2	5	1	2	H	C
HC15	2	5	1	1	H	C
HC15	2	5	1	2	H	C
HC15	2	5	1	1	H	C
HC15	2	5	1	2	H	C
HC15	2	5	1	1	H	C
HC17	1	1	1	1	H	C
HC17	1	1	1	2	H	C
HC17	1	1	1	1	H	C
HC17	1	1	1	2	H	C
HC17	1	1	1	1	H	C
HC17	1	1	1	2	H	C
HC17	1	1	1	1	H	C
HC17	1	1	1	2	H	C
HC17	1	1	1	1	H	C
HC17	1	1	1	2	H	C
HC17	1	1	1	1	H	C
HC17	1	1	1	2	H	C
HC17	1	1	1	1	H	C
HC17	1	1	1	2	H	C
HC17	1	1	1	1	H	C
HC17	1	1	1	2	H	C
HC17	1	1	1	1	H	C
HC17	1	1	1	2	H	C
HC17	1	1	1	1	H	C
HC17	1	1	1	1	H	C
HC17	1	1	1	2	H	C
HC17	1	1	1	1	H	C
HC17	1	2	1	1	H	C
HC17	1	2	1	2	H	C
HC17	1	2	1	1	H	C
HC17	1	2	1	2	H	C
HC17	1	2	1	1	H	C
HC17	1	2	1	2	H	C
HC17	1	2	1	1	H	C
HC17	1	2	1	2	H	C
HC17	1	2	1	1	H	C
HC17	1	2	1	2	H	C
HC17	1	2	1	1	H	C
HC17	1	2	1	1	H	C
HC17	1	2	1	2	H	C
HC17	1	2	1	1	H	C
HC17	1	2	1	1	H	C
HC17	1	2	1	2	H	C
HC17	1	2	1	2	H	C
HC17	1	2	1	1	H	C
HC17	1	2	1	1	H	C
HC17	1	2	1	1	H	C
HC17	1	2	1	2	H	C
HC17	1	2	1	1	H	C
HC17	1	2	1	2	H	C
HC17	1	2	1	1	H	C
HC17	1	2	1	2	H	C
HC17	1	3	1	1	H	C
HC17	1	3	1	2	H	C
HC17	1	3	1	1	H	C
HC17	1	3	1	1	H	C
HC17	1	3	1	2	H	C
HC17	1	3	1	2	H	C
HC17	1	3	1	1	H	C
HC17	1	3	1	2	H	C
HC17	1	3	1	1	H	C
HC17	1	3	1	2	H	C
HC17	1	3	1	1	H	C
HC17	1	3	1	1	H	C
HC17	1	3	1	2	H	C
HC17	1	3	1	1	H	C
HC17	1	3	1	1	H	C
HC17	1	3	1	2	H	C
HC17	1	3	1	1	H	C
HC17	1	3	1	2	H	C
HC17	1	3	1	1	H	C
HC17	1	3	1	1	H	C
HC17	1	3	1	2	H	C
HC17	1	3	1	1	H	C
HC17	1	4	1	1	H	C
HC17	1	4	1	2	H	C
HC17	1	4	1	1	H	C
HC17	1	4	1	2	H	C
HC17	1	4	1	1	H	C
HC17	1	4	1	2	H	C
HC17	1	4	1	1	H	C
HC17	1	4	1	2	H	C
HC17	1	4	1	1	H	C
HC17	1	4	1	2	H	C
HC17	1	4	1	1	H	C
HC17	1	4	1	2	H	C
HC17	1	4	1	1	H	C
HC17	1	4	1	2	H	C
HC17	1	4	1	1	H	C
HC17	1	4	1	2	H	C
HC17	1	4	1	1	H	C
HC17	1	4	1	2	H	C
HC17	1	4	1	1	H	C
HC17	1	4	1	2	H	C
HC17	1	5	1	1	H	C
HC17	1	5	1	2	H	C
HC17	1	5	1	1	H	C
HC17	1	5	1	2	H	C
HC17	1	5	1	1	H	C
HC17	1	5	1	2	H	C
HC17	1	5	1	1	H	C
HC17	1	5	1	2	H	C
HC17	1	5	1	1	H	C
HC17	1	5	1	2	H	C
HC17	1	5	1	1	H	C
HC17	1	5	1	2	H	C
HC17	1	5	1	1	H	C
HC17	2	1	1	1	H	C
HC17	2	1	1	2	H	C
HC17	2	1	1	1	H	C
HC17	2	1	1	2	H	C
HC17	2	1	1	1	H	C
HC17	2	1	1	2	H	C
HC17	2	1	1	1	H	C
HC17	2	1	1	2	H	C
HC17	2	1	1	1	H	C
HC17	2	1	1	2	H	C
HC17	2	1	1	1	H	C
HC17	2	1	1	2	H	C
HC17	2	1	1	1	H	C
HC17	2	1	1	2	H	C
HC17	2	1	1	1	H	C
HC17	2	1	1	2	H	C
HC17	2	1	1	1	H	C
HC17	2	1	1	1	H	C
HC17	2	1	1	2	H	C
HC17	2	1	1	1	H	C
HC17	2	1	1	2	H	C
HC17	2	1	1	1	H	C
HC17	2	2	1	1	H	C
HC17	2	2	1	2	H	C
HC17	2	2	1	1	H	C
HC17	2	2	1	2	H	C
HC17	2	2	1	1	H	C
HC17	2	2	1	2	H	C
HC17	2	2	1	1	H	C
HC17	2	2	1	2	H	C
HC17	2	2	1	1	H	C
HC17	2	2	1	2	H	C
HC17	2	2	1	1	H	C
HC17	2	2	1	2	H	C
HC17	2	2	1	1	H	C
HC17	2	2	1	2	H	C
HC17	2	2	1	1	H	C
HC17	2	2	1	2	H	C
HC17	2	2	1	1	H	C
HC17	2	2	1	2	H	C
HC17	2	2	1	1	H	C
HC17	2	2	1	2	H	C
HC17	2	2	1	1	H	C
HC17	2	2	1	2	H	C
HC17	2	2	1	1	H	C
HC17	2	2	1	2	H	C
HC17	2	2	1	1	H	C
HC17	2	2	1	2	H	C
HC17	2	2	1	1	H	C
HC17	2	2	1	2	H	C
HC17	2	2	1	1	H	C
HC17	2	2	1	2	H	C
HC17	2	2	1	1	H	C
HC17	2	3	1	1	H	C
HC17	2	3	1	2	H	C
HC17	2	3	1	1	H	C
HC17	2	3	1	2	H	C
HC17	2	3	1	1	H	C
HC17	2	3	1	2	H	C
HC17	2	3	1	1	H	C
HC17	2	3	1	2	H	C
HC17	2	3	1	1	H	C
HC17	2	3	1	2	H	C
HC17	2	3	1	1	H	C
HC17	2	3	1	2	H	C
HC17	2	3	1	1	H	C
HC17	2	3	1	2	H	C
HC17	2	3	1	1	H	C
HC17	2	3	1	2	H	C
HC17	2	3	1	1	H	C
HC17	2	3	1	2	H	C
HC17	2	3	1	1	H	C
HC17	2	3	1	2	H	C
HC17	2	3	1	1	H	C
HC17	2	3	1	2	H	C
HC17	2	3	1	1	H	C
HC17	2	4	1	1	H	C
HC17	2	4	1	2	H	C
HC17	2	4	1	1	H	C
HC17	2	4	1	2	H	C
HC17	2	4	1	1	H	C
HC17	2	4	1	2	H	C
HC17	2	4	1	1	H	C
HC17	2	4	1	2	H	C
HC17	2	4	1	1	H	C
HC17	2	4	1	2	H	C
HC17	2	4	1	1	H	C
HC17	2	4	1	2	H	C
HC17	2	4	1	1	H	C
HC17	2	4	1	2	H	C
HC17	2	4	1	1	H	C
HC17	2	4	1	2	H	C
HC17	2	4	1	1	H	C
HC17	2	4	1	2	H	C
HC17	2	4	1	1	H	C
HC17	2	4	1	2	H	C
HC17	2	4	1	1	H	C
HC17	2	4	1	2	H	C
HC17	2	4	1	1	H	C
HC17	2	4	1	2	H	C
HC17	2	4	1	1	H	C
HC17	2	4	1	2	H	C
HC17	2	4	1	1	H	C
HC17	2	4	1	1	H	C
HC17	2	4	1	2	H	C
HC17	2	4	1	1	H	C
HC17	2	4	1	2	H	C
HC17	2	4	1	1	H	C
HC17	2	5	1	1	H	C
HC17	2	5	1	2	H	C
HC17	2	5	1	1	H	C
HC17	2	5	1	2	H	C
HC17	2	5	1	1	H	C
HC17	2	5	1	2	H	C
HC17	2	5	1	1	H	C
HC17	2	5	1	2	H	C
HC17	2	5	1	1	H	C
HC17	2	5	1	2	H	C
HC17	2	5	1	1	H	C
HC17	2	5	1	2	H	C
HC17	2	5	1	1	H	C
HC17	2	5	1	2	H	C
HC17	2	5	1	2	H	C
HC17	2	5	1	1	H	C
HC17	2	5	1	2	H	C
HC17	2	5	1	1	H	C
HC17	2	5	1	2	H	C
HC17	2	5	1	1	H	C
HC17	2	5	1	2	H	C
HC17	2	5	1	1	H	C
HC17	2	5	1	2	H	C
HC19	1	1	1	2	H	C
HC19	1	1	1	1	H	C
HC19	1	1	1	2	H	C
HC19	1	1	1	1	H	C
HC19	1	1	1	2	H	C
HC19	1	1	1	1	H	C
HC19	1	1	1	2	H	C
HC19	1	1	1	1	H	C
HC19	1	1	1	2	H	C
HC19	1	1	1	1	H	C
HC19	1	2	1	2	H	C
HC19	1	2	1	1	H	C
HC19	1	2	1	2	H	C
HC19	1	2	1	1	H	C
HC19	1	2	1	2	H	C
HC19	1	2	1	1	H	C
HC19	1	2	1	2	H	C
HC19	1	2	1	1	H	C
HC19	1	2	1	2	H	C
HC19	1	2	1	1	H	C
HC19	1	2	1	2	H	C
HC19	1	2	1	1	H	C
HC19	1	2	1	2	H	C
HC19	1	2	1	1	H	C
HC19	1	2	1	2	H	C
HC19	1	2	1	1	H	C
HC19	1	2	1	2	H	C
HC19	1	2	1	1	H	C
HC19	1	2	1	2	H	C
HC19	1	3	1	1	H	C
HC19	1	3	1	2	H	C
HC19	1	3	1	1	H	C
HC19	1	3	1	2	H	C
HC19	1	3	1	1	H	C
HC19	1	3	1	2	H	C
HC19	1	3	1	1	H	C
HC19	1	3	1	2	H	C
HC19	1	3	1	1	H	C
HC19	1	3	1	2	H	C
HC19	1	3	1	1	H	C
HC19	1	3	1	2	H	C
HC19	1	3	1	1	H	C
HC19	1	3	1	2	H	C
HC19	1	3	1	1	H	C
HC19	1	3	1	2	H	C
HC19	1	3	1	1	H	C
HC19	1	4	1	1	H	C
HC19	1	4	1	2	H	C
HC19	1	4	1	1	H	C
HC19	1	4	1	2	H	C
HC19	1	4	1	1	H	C
HC19	1	4	1	2	H	C
HC19	1	4	1	1	H	C
HC19	1	4	1	2	H	C
HC19	1	4	1	1	H	C
HC19	1	4	1	2	H	C
HC19	1	4	1	1	H	C
HC19	1	4	1	2	H	C
HC19	1	4	1	1	H	C
HC19	1	4	1	2	H	C
HC19	1	4	1	1	H	C
HC19	1	4	1	2	H	C
HC19	1	4	1	1	H	C
HC19	1	4	1	2	H	C
HC19	1	4	1	1	H	C
HC19	1	4	1	2	H	C
HC19	1	4	1	1	H	C
HC19	1	5	1	1	H	C
HC19	1	5	1	2	H	C
HC19	1	5	1	1	H	C
HC19	1	5	1	2	H	C
HC19	1	5	1	1	H	C
HC19	1	5	1	2	H	C
HC19	1	5	1	1	H	C
HC19	1	5	1	2	H	C
HC19	1	5	1	1	H	C
HC19	1	5	1	2	H	C
HC19	1	5	1	1	H	C
HC19	1	5	1	2	H	C
HC19	1	5	1	1	H	C
HC19	1	5	1	2	H	C
HC19	1	5	1	1	H	C
HC19	1	5	1	2	H	C
HC19	1	5	1	1	H	C
HC19	1	5	1	2	H	C
HC19	1	5	1	1	H	C
HC19	1	5	1	2	H	C
HC19	2	1	1	1	H	C
HC19	2	1	1	2	H	C
HC19	2	1	1	1	H	C
HC19	2	1	1	2	H	C
HC19	2	1	1	1	H	C
HC19	2	1	1	2	H	C
HC19	2	1	1	1	H	C
HC19	2	1	1	2	H	C
HC19	2	1	1	1	H	C
HC19	2	1	1	2	H	C
HC19	2	1	1	1	H	C
HC19	2	1	1	2	H	C
HC19	2	1	1	1	H	C
HC19	2	1	1	2	H	C
HC19	2	1	1	1	H	C
HC19	2	1	1	2	H	C
HC19	2	1	1	1	H	C
HC19	2	1	1	2	H	C
HC19	2	1	1	1	H	C
HC19	2	1	1	2	H	C
HC19	2	1	1	1	H	C
HC19	2	1	1	2	H	C
HC19	2	1	1	1	H	C
HC19	2	1	1	2	H	C
HC19	2	1	1	1	H	C
HC19	2	1	1	2	H	C
HC19	2	1	1	1	H	C
HC19	2	2	1	2	H	C
HC19	2	2	1	1	H	C
HC19	2	2	1	2	H	C
HC19	2	2	1	1	H	C
HC19	2	2	1	2	H	C
HC19	2	2	1	1	H	C
HC19	2	2	1	2	H	C
HC19	2	2	1	1	H	C
HC19	2	2	1	2	H	C
HC19	2	2	1	1	H	C
HC19	2	2	1	2	H	C
HC19	2	2	1	1	H	C
HC19	2	2	1	1	H	C
HC19	2	2	1	2	H	C
HC19	2	2	1	1	H	C
HC19	2	2	1	2	H	C
HC19	2	2	1	1	H	C
HC19	2	2	1	2	H	C
HC19	2	2	1	1	H	C
HC19	2	2	1	2	H	C
HC19	2	2	1	1	H	C
HC19	2	2	1	2	H	C
HC19	2	2	1	1	H	C
HC19	2	2	1	2	H	C
HC19	2	3	1	1	H	C
HC19	2	3	1	2	H	C
HC19	2	3	1	1	H	C
HC19	2	3	1	2	H	C
HC19	2	3	1	1	H	C
HC19	2	3	1	2	H	C
HC19	2	3	1	1	H	C
HC19	2	3	1	2	H	C
HC19	2	3	1	1	H	C
HC19	2	3	1	2	H	C
HC19	2	3	1	1	H	C
HC19	2	3	1	2	H	C
HC19	2	3	1	1	H	C
HC19	2	3	1	2	H	C
HC19	2	3	1	1	H	C
HC19	2	3	1	2	H	C
HC19	2	3	1	1	H	C
HC19	2	3	1	2	H	C
HC19	2	3	1	1	H	C
HC19	2	3	1	2	H	C
HC19	2	3	1	1	H	C
HC19	2	3	1	2	H	C
HC19	2	3	1	1	H	C
HC19	2	3	1	2	H	C
HC19	2	4	1	1	H	C
HC19	2	4	1	2	H	C
HC19	2	4	1	1	H	C
HC19	2	4	1	2	H	C
HC19	2	4	1	1	H	C
HC19	2	4	1	2	H	C
HC19	2	4	1	1	H	C
HC19	2	5	1	1	H	C
HC19	2	5	1	2	H	C
HC19	2	5	1	1	H	C
HC21	1	1	1	1	H	C
HC21	1	1	1	2	H	C
HC21	1	1	1	1	H	C
HC21	1	1	1	2	H	C
HC21	1	1	1	1	H	C
HC21	1	1	1	2	H	C
HC21	1	1	1	1	H	C
HC21	1	1	1	2	H	C
HC21	1	1	1	1	H	C
HC21	1	1	1	2	H	C
HC21	1	1	1	1	H	C
HC21	1	1	1	2	H	C
HC21	1	1	1	1	H	C
HC21	1	1	1	2	H	C
HC21	1	1	1	1	H	C
HC21	1	1	1	2	H	C
HC21	1	1	1	1	H	C
HC21	1	1	1	2	H	C
HC21	1	1	1	1	H	C
HC21	1	1	1	2	H	C
HC21	1	1	1	1	H	C
HC21	1	1	1	2	H	C
HC21	1	1	1	1	H	C
HC21	1	1	1	2	H	C
HC21	1	1	1	1	H	C
HC21	1	1	1	2	H	C
HC21	1	1	1	1	H	C
HC21	1	1	1	2	H	C
HC21	1	1	1	1	H	C
HC21	1	1	1	2	H	C
HC21	1	1	1	1	H	C
HC21	1	1	1	2	H	C
HC21	1	1	1	1	H	C
HC21	1	1	1	2	H	C
HC21	1	1	1	1	H	C
HC21	1	1	1	2	H	C
HC21	1	1	1	1	H	C
HC21	1	1	1	2	H	C
HC21	1	1	1	1	H	C
HC21	1	1	1	2	H	C
HC21	1	1	1	1	H	C
HC21	1	1	1	2	H	C
HC21	1	1	1	1	H	C
HC21	1	1	1	1	H	C
HC21	1	1	1	2	H	C
HC21	1	2	1	2	H	C
HC21	1	2	1	1	H	C
HC21	1	2	1	2	H	C
HC21	1	2	1	1	H	C
HC21	1	2	1	2	H	C
HC21	1	2	1	1	H	C
HC21	1	2	1	2	H	C
HC21	1	2	1	1	H	C
HC21	1	2	1	2	H	C
HC21	1	2	1	1	H	C
HC21	1	2	1	2	H	C
HC21	1	2	1	1	H	C
HC21	1	2	1	2	H	C
HC21	1	2	1	1	H	C
HC21	1	2	1	2	H	C
HC21	1	2	1	1	H	C
HC21	1	2	1	2	H	C
HC21	1	2	1	1	H	C
HC21	1	2	1	2	H	C
HC21	1	2	1	1	H	C
HC21	1	2	1	2	H	C
HC21	1	2	1	1	H	C
HC21	1	2	1	2	H	C
HC21	1	2	1	1	H	C
HC21	1	2	1	2	H	C
HC21	1	2	1	1	H	C
HC21	1	2	1	2	H	C
HC21	1	2	1	1	H	C
HC21	1	2	1	2	H	C
HC21	1	2	1	1	H	C
HC21	1	2	1	2	H	C
HC21	1	2	1	1	H	C
HC21	1	2	1	2	H	C
HC21	1	2	1	1	H	C
HC21	1	2	1	2	H	C
HC21	1	2	1	1	H	C
HC21	1	2	1	2	H	C
HC21	1	2	1	1	H	C
HC21	1	2	1	2	H	C
HC21	1	2	1	1	H	C
HC21	1	2	1	2	H	C
HC21	1	2	1	1	H	C
HC21	1	2	1	2	H	C
HC21	1	2	1	1	H	C
HC21	1	2	1	2	H	C
HC21	1	2	1	1	H	C
HC21	1	2	1	2	H	C
HC21	1	2	1	1	H	C
HC21	1	3	1	1	H	C
HC21	1	3	1	2	H	C
HC21	1	3	1	1	H	C
HC21	1	3	1	2	H	C
HC21	1	3	1	1	H	C
HC21	1	3	1	2	H	C
HC21	1	3	1	1	H	C
HC21	1	3	1	2	H	C
HC21	1	3	1	1	H	C
HC21	1	3	1	2	H	C
HC21	1	3	1	1	H	C
HC21	1	3	1	2	H	C
HC21	1	3	1	1	H	C
HC21	1	3	1	2	H	C
HC21	1	3	1	1	H	C
HC21	1	3	1	2	H	C
HC21	1	3	1	1	H	C
HC21	1	3	1	2	H	C
HC21	1	3	1	1	H	C
HC21	1	3	1	2	H	C
HC21	1	3	1	1	H	C
HC21	1	3	1	2	H	C
HC21	1	3	1	1	H	C
HC21	1	3	1	2	H	C
HC21	1	3	1	1	H	C
HC21	1	3	1	2	H	C
HC21	1	3	1	1	H	C
HC21	1	3	1	2	H	C
HC21	1	3	1	1	H	C
HC21	1	3	1	2	H	C
HC21	1	3	1	1	H	C
HC21	1	3	1	2	H	C
HC21	1	3	1	1	H	C
HC21	1	3	1	2	H	C
HC21	1	3	1	1	H	C
HC21	1	3	1	2	H	C
HC21	1	3	1	1	H	C
HC21	1	3	1	2	H	C
HC21	1	3	1	1	H	C
HC21	1	4	1	2	H	C
HC21	1	4	1	1	H	C
HC21	1	4	1	2	H	C
HC21	1	4	1	1	H	C
HC21	1	4	1	2	H	C
HC21	1	4	1	1	H	C
HC21	1	4	1	2	H	C
HC21	1	4	1	1	H	C
HC21	1	4	1	2	H	C
HC21	1	4	1	1	H	C
HC21	1	4	1	2	H	C
HC21	1	4	1	1	H	C
HC21	1	4	1	2	H	C
HC21	1	4	1	1	H	C
HC21	1	4	1	2	H	C
HC21	1	4	1	1	H	C
HC21	1	4	1	2	H	C
HC21	1	4	1	1	H	C
HC21	1	4	1	2	H	C
HC21	1	4	1	1	H	C
HC21	1	4	1	2	H	C
HC21	1	4	1	1	H	C
HC21	1	4	1	2	H	C
HC21	1	4	1	1	H	C
HC21	1	4	1	2	H	C
HC21	1	4	1	1	H	C
HC21	1	4	1	2	H	C
HC21	1	4	1	1	H	C
HC21	1	4	1	2	H	C
HC21	1	4	1	1	H	C
HC21	1	4	1	2	H	C
HC21	1	4	1	1	H	C
HC21	1	4	1	2	H	C
HC21	1	4	1	1	H	C
HC21	1	4	1	2	H	C
HC21	1	4	1	1	H	C
HC21	1	4	1	2	H	C
HC21	1	4	1	1	H	C
HC21	1	4	1	2	H	C
HC21	1	4	1	1	H	C
HC21	1	5	1	1	H	C
HC21	1	5	1	2	H	C
HC21	1	5	1	1	H	C
HC21	1	5	1	2	H	C
HC21	1	5	1	1	H	C
HC21	1	5	1	2	H	C
HC21	1	5	1	1	H	C
HC21	1	5	1	2	H	C
HC21	1	5	1	1	H	C
HC21	1	5	1	2	H	C
HC21	1	5	1	1	H	C
HC21	1	5	1	2	H	C
HC21	1	5	1	1	H	C
HC21	1	5	1	2	H	C
HC21	1	5	1	1	H	C
HC21	1	5	1	2	H	C
HC21	1	5	1	1	H	C
HC21	1	5	1	2	H	C
HC21	1	5	1	1	H	C
HC21	1	5	1	2	H	C
HC21	1	5	1	1	H	C
HC21	1	5	1	2	H	C
HC21	1	5	1	1	H	C
HC21	1	5	1	2	H	C
HC21	1	5	1	1	H	C
HC21	1	5	1	2	H	C
HC21	1	5	1	1	H	C
HC21	1	5	1	2	H	C
HC21	1	5	1	1	H	C
HC21	1	5	1	2	H	C
HC21	1	5	1	1	H	C
HC21	1	5	1	2	H	C
HC21	1	5	1	1	H	C
HC21	1	5	1	2	H	C
HC21	1	5	1	1	H	C
HC21	1	5	1	2	H	C
HC21	1	5	1	1	H	C
HC21	1	5	1	2	H	C
HC21	2	1	1	2	H	C
HC21	2	1	1	1	H	C
HC21	2	1	1	2	H	C
HC21	2	1	1	1	H	C
HC21	2	1	1	2	H	C
HC21	2	1	1	1	H	C
HC21	2	1	1	2	H	C
HC21	2	1	1	1	H	C
HC21	2	1	1	2	H	C
HC21	2	1	1	1	H	C
HC21	2	1	1	2	H	C
HC21	2	1	1	1	H	C
HC21	2	1	1	2	H	C
HC21	2	1	1	1	H	C
HC21	2	1	1	2	H	C
HC21	2	1	1	1	H	C
HC21	2	1	1	2	H	C
HC21	2	1	1	1	H	C
HC21	2	1	1	2	H	C
HC21	2	1	1	1	H	C
HC21	2	1	1	2	H	C
HC21	2	1	1	1	H	C
HC21	2	1	1	2	H	C
HC21	2	1	1	1	H	C
HC21	2	1	1	2	H	C
HC21	2	1	1	1	H	C
HC21	2	1	1	2	H	C
HC21	2	1	1	1	H	C
HC21	2	1	1	2	H	C
HC21	2	1	1	1	H	C
HC21	2	1	1	2	H	C
HC21	2	1	1	1	H	C
HC21	2	1	1	2	H	C
HC21	2	1	1	1	H	C
HC21	2	1	1	2	H	C
HC21	2	1	1	1	H	C
HC21	2	1	1	2	H	C
HC21	2	1	1	1	H	C
HC21	2	1	1	2	H	C
HC21	2	1	1	1	H	C
HC21	2	1	1	2	H	C
HC21	2	1	1	1	H	C
HC21	2	1	1	2	H	C
HC21	2	1	1	1	H	C
HC21	2	1	1	2	H	C
HC21	2	1	1	1	H	C
HC21	2	1	1	2	H	C
HC21	2	1	1	1	H	C
HC21	2	1	1	2	H	C
HC21	2	1	1	1	H	C
HC21	2	1	1	2	H	C
HC21	2	1	1	1	H	C
HC21	2	2	1	2	H	C
HC21	2	2	1	1	H	C
HC21	2	2	1	2	H	C
HC21	2	2	1	1	H	C
HC21	2	2	1	2	H	C
HC21	2	2	1	1	H	C
HC21	2	2	1	2	H	C
HC21	2	2	1	1	H	C
HC21	2	2	1	2	H	C
HC21	2	2	1	1	H	C
HC21	2	2	1	2	H	C
HC21	2	2	1	1	H	C
HC21	2	2	1	2	H	C
HC21	2	2	1	1	H	C
HC21	2	2	1	2	H	C
HC21	2	2	1	1	H	C
HC21	2	2	1	2	H	C
HC21	2	2	1	1	H	C
HC21	2	2	1	2	H	C
HC21	2	2	1	1	H	C
HC21	2	2	1	2	H	C
HC21	2	2	1	1	H	C
HC21	2	2	1	2	H	C
HC21	2	2	1	1	H	C
HC21	2	2	1	2	H	C
HC21	2	2	1	1	H	C
HC21	2	2	1	2	H	C
HC21	2	2	1	1	H	C
HC21	2	2	1	2	H	C
HC21	2	2	1	1	H	C
HC21	2	2	1	2	H	C
HC21	2	2	1	1	H	C
HC21	2	2	1	2	H	C
HC21	2	2	1	1	H	C
HC21	2	2	1	2	H	C
HC21	2	2	1	1	H	C
HC21	2	2	1	2	H	C
HC21	2	2	1	1	H	C
HC21	2	2	1	2	H	C
HC21	2	2	1	1	H	C
HC21	2	2	1	2	H	C
HC21	2	2	1	1	H	C
HC21	2	2	1	2	H	C
HC21	2	2	1	1	H	C
HC21	2	2	1	2	H	C
HC21	2	2	1	1	H	C
HC21	2	2	1	2	H	C
HC21	2	2	1	1	H	C
HC21	2	2	1	2	H	C
HC21	2	2	1	1	H	C
HC21	2	2	1	2	H	C
HC21	2	2	1	1	H	C
HC21	2	2	1	2	H	C
HC21	2	3	1	2	H	C
HC21	2	3	1	1	H	C
HC21	2	3	1	2	H	C
HC21	2	3	1	1	H	C
HC21	2	3	1	2	H	C
HC21	2	3	1	1	H	C
HC21	2	3	1	2	H	C
HC21	2	3	1	1	H	C
HC21	2	3	1	2	H	C
HC21	2	3	1	1	H	C
HC21	2	3	1	2	H	C
HC21	2	3	1	1	H	C
HC21	2	3	1	2	H	C
HC21	2	3	1	1	H	C
HC21	2	3	1	2	H	C
HC21	2	3	1	1	H	C
HC21	2	3	1	2	H	C
HC21	2	3	1	1	H	C
HC21	2	3	1	2	H	C
HC21	2	3	1	1	H	C
HC21	2	3	1	2	H	C
HC21	2	3	1	1	H	C
HC21	2	3	1	2	H	C
HC21	2	3	1	1	H	C
HC21	2	3	1	2	H	C
HC21	2	3	1	1	H	C
HC21	2	3	1	2	H	C
HC21	2	3	1	1	H	C
HC21	2	3	1	2	H	C
HC21	2	3	1	1	H	C
HC21	2	3	1	2	H	C
HC21	2	3	1	1	H	C
HC21	2	3	1	2	H	C
HC21	2	3	1	1	H	C
HC21	2	3	1	2	H	C
HC21	2	3	1	1	H	C
HC21	2	3	1	2	H	C
HC21	2	3	1	1	H	C
HC21	2	3	1	2	H	C
HC21	2	3	1	1	H	C
HC21	2	3	1	2	H	C
HC21	2	3	1	1	H	C
HC21	2	3	1	2	H	C
HC21	2	3	1	1	H	C
HC21	2	3	1	2	H	C
HC21	2	3	1	1	H	C
HC21	2	3	1	2	H	C
HC21	2	3	1	1	H	C
HC21	2	3	1	2	H	C
HC21	2	3	1	1	H	C
HC21	2	3	1	2	H	C
HC21	2	4	1	2	H	C
HC21	2	4	1	1	H	C
HC21	2	4	1	2	H	C
HC21	2	4	1	1	H	C
HC21	2	4	1	2	H	C
HC21	2	4	1	1	H	C
HC21	2	4	1	2	H	C
HC21	2	4	1	1	H	C
HC21	2	4	1	2	H	C
HC21	2	4	1	1	H	C
HC21	2	4	1	2	H	C
HC21	2	4	1	1	H	C
HC21	2	4	1	2	H	C
HC21	2	4	1	1	H	C
HC21	2	4	1	2	H	C
HC21	2	4	1	1	H	C
HC21	2	4	1	2	H	C
HC21	2	4	1	1	H	C
HC21	2	4	1	2	H	C
HC21	2	4	1	1	H	C
HC21	2	4	1	2	H	C
HC21	2	4	1	1	H	C
HC21	2	4	1	2	H	C
HC21	2	4	1	1	H	C
HC21	2	4	1	2	H	C
HC21	2	4	1	1	H	C
HC21	2	4	1	2	H	C
HC21	2	4	1	1	H	C
HC21	2	4	1	2	H	C
HC21	2	4	1	1	H	C
HC21	2	4	1	2	H	C
HC21	2	4	1	1	H	C
HC21	2	4	1	2	H	C
HC21	2	4	1	1	H	C
HC21	2	4	1	2	H	C
HC21	2	4	1	1	H	C
HC21	2	4	1	2	H	C
HC21	2	4	1	1	H	C
HC21	2	4	1	2	H	C
HC21	2	4	1	1	H	C
HC21	2	4	1	2	H	C
HC21	2	4	1	1	H	C
HC21	2	4	1	2	H	C
HC21	2	4	1	1	H	C
HC21	2	4	1	2	H	C
HC21	2	4	1	1	H	C
HC21	2	4	1	2	H	C
HC21	2	4	1	1	H	C
HC21	2	4	1	2	H	C
HC21	2	4	1	1	H	C
HC21	2	5	1	2	H	C
HC21	2	5	1	1	H	C
HC21	2	5	1	2	H	C
HC21	2	5	1	1	H	C
HC21	2	5	1	2	H	C
HC21	2	5	1	1	H	C
HC21	2	5	1	2	H	C
HC21	2	5	1	1	H	C
HC21	2	5	1	2	H	C
HC21	2	5	1	1	H	C
HC21	2	5	1	2	H	C
HC21	2	5	1	1	H	C
HC21	2	5	1	2	H	C
HC21	2	5	1	1	H	C
HC21	2	5	1	2	H	C
HC21	2	5	1	1	H	C
HC21	2	5	1	2	H	C
HC21	2	5	1	1	H	C
HC21	2	5	1	2	H	C
HC21	2	5	1	1	H	C
HC21	2	5	1	2	H	C
HC21	2	5	1	1	H	C
HC21	2	5	1	2	H	C
HC21	2	5	1	1	H	C
HC21	2	5	1	2	H	C
HC21	2	5	1	1	H	C
HC21	2	5	1	2	H	C
HC21	2	5	1	1	H	C
HC21	2	5	1	2	H	C
HC21	2	5	1	1	H	C
HC21	2	5	1	2	H	C
HC21	2	5	1	1	H	C
HC21	2	5	1	2	H	C
HC21	2	5	1	1	H	C
HC21	2	5	1	2	H	C
HC21	2	5	1	1	H	C
HC21	2	5	1	2	H	C
HC21	2	5	1	1	H	C
HC21	2	5	1	2	H	C
HC21	2	5	1	1	H	C
HC21	2	5	1	2	H	C
HC21	2	5	1	1	H	C
HC21	2	5	1	2	H	C
HC21	2	5	1	1	H	C
HC21	2	5	1	2	H	C
HC21	2	5	1	1	H	C
HC21	2	5	1	2	H	C
HC3	1	1	1	1	H	C
HC3	1	1	1	2	H	C
HC3	1	1	1	1	H	C
HC3	1	1	1	2	H	C
HC3	1	1	1	1	H	C
HC3	1	1	1	2	H	C
HC3	1	1	1	1	H	C
HC3	1	1	1	2	H	C
HC3	1	1	1	1	H	C
HC3	1	1	1	2	H	C
HC3	1	1	1	1	H	C
HC3	1	1	1	2	H	C
HC3	1	1	1	1	H	C
HC3	1	1	1	2	H	C
HC3	1	1	1	1	H	C
HC3	1	1	1	2	H	C
HC3	1	1	1	1	H	C
HC3	1	1	1	2	H	C
HC3	1	2	1	1	H	C
HC3	1	2	1	2	H	C
HC3	1	2	1	1	H	C
HC3	1	2	1	2	H	C
HC3	1	2	1	1	H	C
HC3	1	2	1	2	H	C
HC3	1	2	1	1	H	C
HC3	1	2	1	2	H	C
HC3	1	2	1	1	H	C
HC3	1	2	1	2	H	C
HC3	1	2	1	1	H	C
HC3	1	2	1	2	H	C
HC3	1	2	1	1	H	C
HC3	1	2	1	2	H	C
HC3	1	2	1	1	H	C
HC3	1	2	1	2	H	C
HC3	1	2	1	1	H	C
HC3	1	3	1	1	H	C
HC3	1	3	1	2	H	C
HC3	1	3	1	1	H	C
HC3	1	3	1	2	H	C
HC3	1	3	1	1	H	C
HC3	1	3	1	2	H	C
HC3	1	3	1	1	H	C
HC3	1	3	1	2	H	C
HC3	1	3	1	1	H	C
HC3	1	3	1	1	H	C
HC3	1	3	1	2	H	C
HC3	1	3	1	1	H	C
HC3	1	3	1	2	H	C
HC3	1	3	1	1	H	C
HC3	1	3	1	2	H	C
HC3	1	4	1	1	H	C
HC3	1	4	1	2	H	C
HC3	1	4	1	1	H	C
HC3	1	4	1	2	H	C
HC3	1	4	1	1	H	C
HC3	1	4	1	2	H	C
HC3	1	4	1	1	H	C
HC3	1	4	1	2	H	C
HC3	1	4	1	1	H	C
HC3	1	4	1	2	H	C
HC3	1	4	1	1	H	C
HC3	1	4	1	1	H	C
HC3	1	4	1	2	H	C
HC3	1	4	1	1	H	C
HC3	1	4	1	2	H	C
HC3	1	4	1	1	H	C
HC3	1	4	1	2	H	C
HC3	1	4	1	2	H	C
HC3	1	4	1	1	H	C
HC3	1	5	1	1	H	C
HC3	1	5	1	2	H	C
HC3	1	5	1	1	H	C
HC3	1	5	1	2	H	C
HC3	1	5	1	1	H	C
HC3	1	5	1	2	H	C
HC3	1	5	1	1	H	C
HC3	1	5	1	2	H	C
HC3	1	5	1	1	H	C
HC3	1	5	1	2	H	C
HC3	1	5	1	1	H	C
HC3	1	5	1	2	H	C
HC3	1	5	1	1	H	C
HC3	1	5	1	2	H	C
HC3	1	5	1	1	H	C
HC3	1	5	1	2	H	C
HC3	2	1	1	1	H	C
HC3	2	1	1	2	H	C
HC3	2	1	1	1	H	C
HC3	2	1	1	2	H	C
HC3	2	1	1	1	H	C
HC3	2	1	1	2	H	C
HC3	2	1	1	1	H	C
HC3	2	1	1	2	H	C
HC3	2	1	1	1	H	C
HC3	2	1	1	2	H	C
HC3	2	1	1	1	H	C
HC3	2	1	1	2	H	C
HC3	2	1	1	1	H	C
HC3	2	1	1	2	H	C
HC3	2	2	1	1	H	C
HC3	2	2	1	2	H	C
HC3	2	2	1	1	H	C
HC3	2	2	1	2	H	C
HC3	2	2	1	1	H	C
HC3	2	2	1	2	H	C
HC3	2	2	1	1	H	C
HC3	2	2	1	2	H	C
HC3	2	2	1	1	H	C
HC3	2	2	1	2	H	C
HC3	2	2	1	1	H	C
HC3	2	2	1	2	H	C
HC3	2	2	1	1	H	C
HC3	2	2	1	2	H	C
HC3	2	2	1	1	H	C
HC3	2	2	1	2	H	C
HC3	2	3	1	1	H	C
HC3	2	3	1	2	H	C
HC3	2	3	1	1	H	C
HC3	2	3	1	2	H	C
HC3	2	3	1	1	H	C
HC3	2	3	1	2	H	C
HC3	2	3	1	1	H	C
HC3	2	3	1	2	H	C
HC3	2	3	1	1	H	C
HC3	2	3	1	2	H	C
HC3	2	3	1	1	H	C
HC3	2	3	1	2	H	C
HC3	2	3	1	1	H	C
HC3	2	3	1	2	H	C
HC3	2	3	1	1	H	C
HC3	2	3	1	2	H	C
HC3	2	3	1	1	H	C
HC3	2	3	1	2	H	C
HC3	2	3	1	1	H	C
HC3	2	3	1	2	H	C
HC3	2	4	1	1	H	C
HC3	2	4	1	2	H	C
HC3	2	4	1	1	H	C
HC3	2	4	1	2	H	C
HC3	2	4	1	1	H	C
HC3	2	4	1	2	H	C
HC3	2	4	1	1	H	C
HC3	2	4	1	2	H	C
HC3	2	4	1	1	H	C
HC3	2	4	1	2	H	C
HC3	2	4	1	1	H	C
HC3	2	4	1	2	H	C
HC3	2	4	1	1	H	C
HC3	2	4	1	2	H	C
HC3	2	4	1	1	H	C
HC3	2	5	1	1	H	C
HC3	2	5	1	2	H	C
HC3	2	5	1	1	H	C
HC3	2	5	1	2	H	C
HC3	2	5	1	1	H	C
HC3	2	5	1	2	H	C
HC3	2	5	1	1	H	C
HC3	2	5	1	2	H	C
HC3	2	5	1	1	H	C
HC3	2	5	1	2	H	C
HC3	2	5	1	1	H	C
HC3	2	5	1	2	H	C
HC3	2	5	1	1	H	C
HC5	1	1	1	1	H	C
HC5	1	1	1	2	H	C
HC5	1	1	1	1	H	C
HC5	1	1	1	2	H	C
HC5	1	1	1	1	H	C
HC5	1	1	1	2	H	C
HC5	1	2	1	2	H	C
HC5	1	2	1	1	H	C
HC5	1	2	1	2	H	C
HC5	1	2	1	1	H	C
HC5	1	2	1	2	H	C
HC5	1	2	1	1	H	C
HC5	1	2	1	2	H	C
HC5	1	2	1	1	H	C
HC5	1	2	1	2	H	C
HC5	1	3	1	1	H	C
HC5	1	3	1	2	H	C
HC5	1	3	1	1	H	C
HC5	1	3	1	2	H	C
HC5	1	3	1	1	H	C
HC5	1	3	1	2	H	C
HC5	1	3	1	1	H	C
HC5	1	3	1	2	H	C
HC5	1	3	1	1	H	C
HC5	1	3	1	2	H	C
HC5	1	3	1	1	H	C
HC5	1	3	1	2	H	C
[truncated: 9,551 more rows]
